# Supplementary material
Source: HighWire-hosted journal article supplement (https://www.jabfm.org/highwire/filestream/10993/field_highwire_adjunct_files/0/06-0081_Erratum.pdf)
Supplement: 06-0081_Erratum.pdf [file 06-0081_Erratum.pdf]

**Table 3: Motivators for Making Error Reports**

| <b>Reporting factors</b> | <b>Category from Participants</b>                                                                     | <b>Total Groups*</b>                   | <b>Total Practices†</b> |
|--------------------------|-------------------------------------------------------------------------------------------------------|----------------------------------------|-------------------------|
| Burden of effort         | Dedicated report maker<br>'Cheerleader' in practice                                                   | 2 (2P)<br>1 (S)                        | 2<br>1                  |
| Clarity of request       | System problem<br>Anonymity                                                                           | 2 (2P)<br>3 (1S, 2P)                   | 2<br>3                  |
| Perceived benefit        | Reporter properties<br>Emotional state<br>Responses to report<br>Get feedback<br>Get tangible benefit | 5 (2S, 3P)<br><br>3 (3P)<br>6 (3S, 3P) | 3<br><br>3<br>5         |
| Properties of the error  | Error is serious<br>Reporter made the error                                                           | 4 (2S, 1P)<br>2 (2P)                   | 2<br>2                  |

\* Total groups = number of groups in which a category was mentioned by a participant;  
S = staff group, P = physician group, M = mixed group of physicians and staff

† Total practices = number of practices in which a category was mentioned by a participant

**Erratum for Table 3: Perceived benefit was omitted from the reporting factors column.**
